# Supplementary material
Source: PubMed Central journal article supplement (PMC6865272)
Supplement: NIHMS1057626-supplement-Supplement.pdf [file NIHMS1057626-supplement-Supplement.pdf]

## Supplementary Data

### Polyvalent Folate-Dendrimer-Coated Iron Oxide Theranostic Nanoparticles for Simultaneous Magnetic Resonance Imaging and Precise Cancer Cell Targeting

Western blot analysis of Caspase 3:

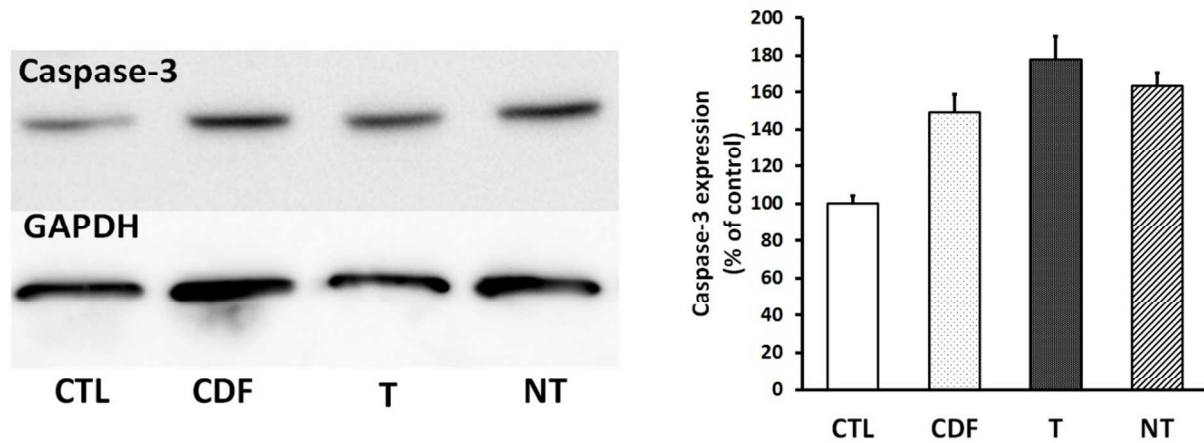

**Figure S1.** Western blot analysis and quantification of Caspase 3 with respect to GAPDH. The quantified data indicates the upregulation of Caspase-3 expression for targeted formulation SPIONs@FA-PAMAM-CDF (T) treatment than the control without treatment (CTL), cells treated with CDF, and non-targeted formulation SPIONs@PAMAM-CDF (NT) in HeLa cell line (GAPDH expression was used as the protein loading control).
